# Supplementary material
Source: Springer Nature journal article supplement (https://publikationen.ub.uni-frankfurt.de/files/22067/12864_2010_3436_MOESM4_ESM.pdf)

Mt genome coverage COIII after a) first- and b) meta-assembly.

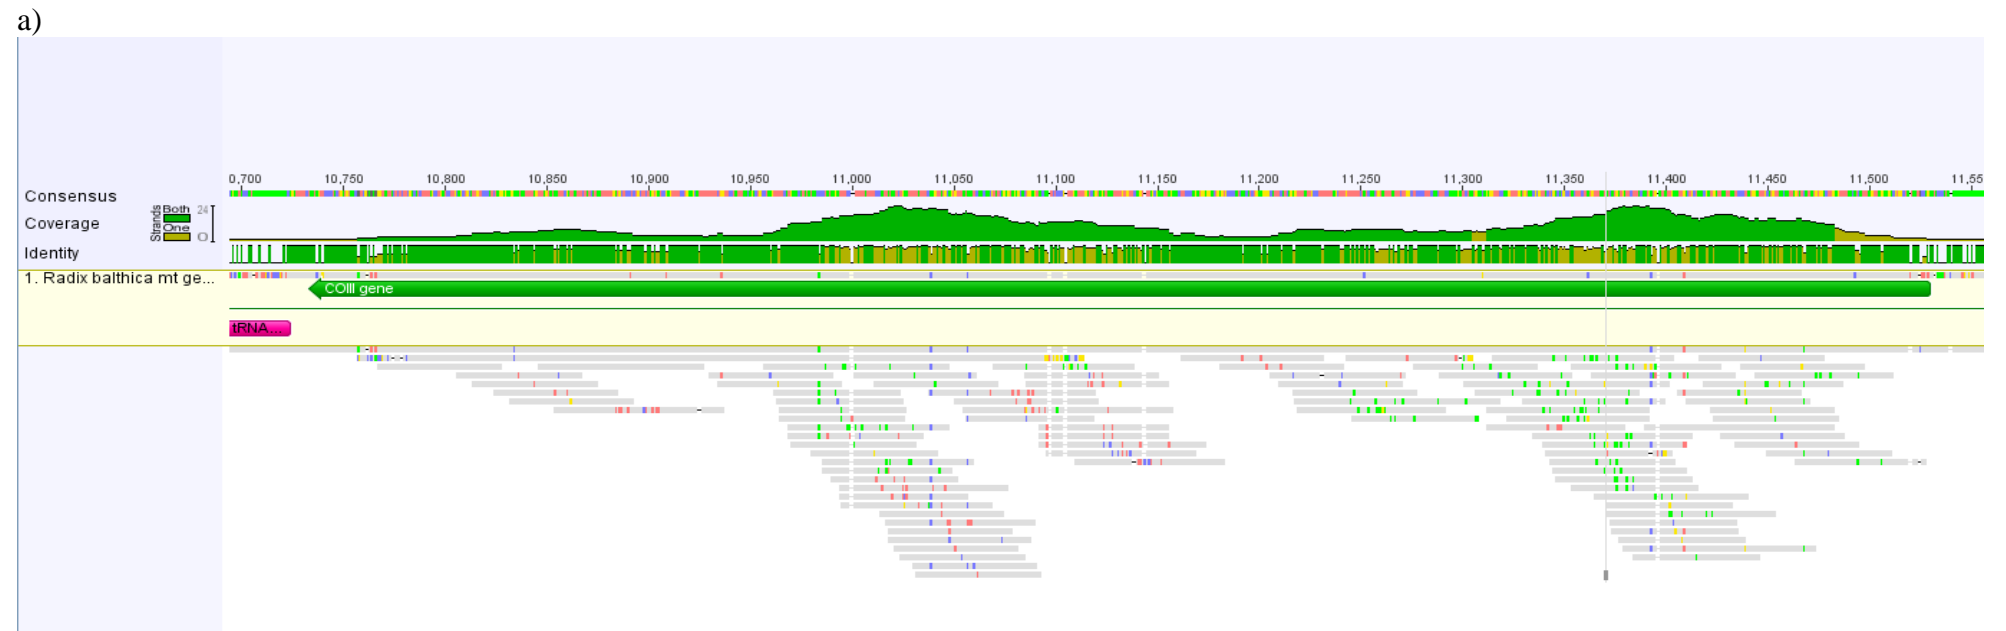

b)

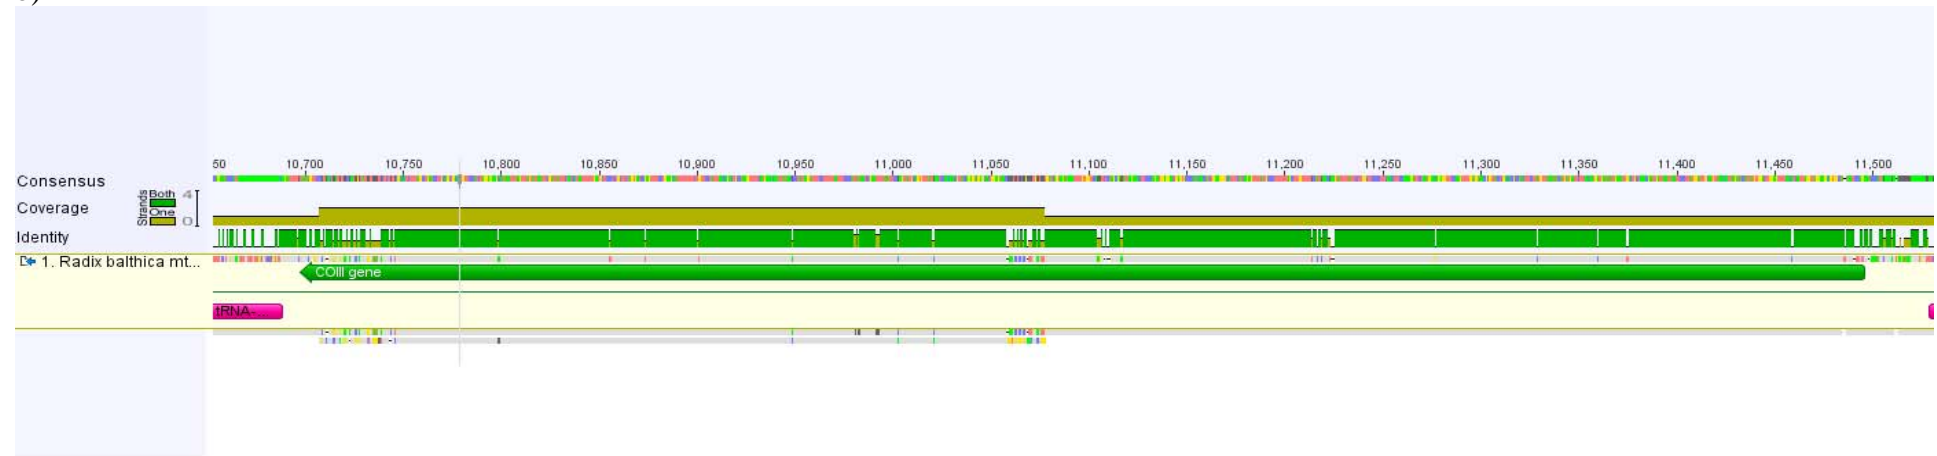

Supplement: MOESM4 [file 12864_2010_3436_MOESM4_ESM.pdf]
